# Supplementary material for: Prickly Connections: Sociodemographic Factors Shaping Attitudes, Perception and Biological Knowledge about the European Hedgehog
Source: MDPI journal article supplement (doi:10.3390/ani13233610), 2023-11-22
Supplement: s1 [file s1]

**Supplementary Table** for “Prickly connections: sociodemographic factors shaping attitudes, perception and biological knowledge about hedgehog” by Ribeiro et al. 2023.

**Table S1.** Details about the data collected. Variables used for the statistical analyses and their attributes.

| Variables                                             | Type        | Attributes                                                                                        |
|-------------------------------------------------------|-------------|---------------------------------------------------------------------------------------------------|
| <b>Dependent</b>                                      |             |                                                                                                   |
| <b>Attitude</b><br>Hedgehog in difficulty             | categorical | 1 – seek help; 2 – help (myself); 3 - ignore; 4 – scare it; 5 - kill                              |
| <b>Feelings</b><br>Feelings associated                | categorical | 1 (all negative) to 6 (all positive)                                                              |
| <b>Perception</b><br>Human impact on mortality        | categorical | 1 (very unimportant) to 6 (very important)                                                        |
| <b>Perception</b><br>Management/conservation measures | categorical | 1 - protect; 2 - control; 3 - eliminate                                                           |
| <b>Perception</b><br>Species impact on agriculture    | categorical | 1 (very negative) to 6 (very positive)                                                            |
| <b>Knowledge</b><br>State of the population           | categorical | 1 - declining; 2 - stable; 3 - increasing                                                         |
| <b>Knowledge</b><br>Sexing method                     | categorical | 1 - anogenital distance; 2 – testicles; 3 - size; 4 - I don't know                                |
| <b>Knowledge</b><br>Life expectancy (years)           | categorical | 1 - three; 2 - five; 3 - ten; 4 - I don't know                                                    |
| <b>Knowledge</b><br>Legislation RE captivity          | categorical | 1 - yes; 2 - no; 3 - I don't know                                                                 |
| <b>Knowledge</b><br>Main cause death in PRT           | categorical | 1- car hit; 2 – sickness; 3- starvation; 4- poisoning; 5 – trap; 6 - hypothermia, 7- I don't know |
| <b>Knowledge</b><br>Geographic distribution           | categorical | 1 - Europe; 2 - Europe and New Zealand; 3 - All continents; 4 - I don't know                      |
| <b>Knowledge</b><br>Habitat preference                | categorical | 1 - urban areas; 2 - suburban areas; 3 - rural areas                                              |
| <b>Knowledge</b><br>Period of activity                | categorical | 1 - diurnal; 2 - nocturnal; 3 - I don't know                                                      |
| <b>Knowledge</b><br>Period of life in deep sleep      | categorical | 1 - winter; 2 - summer; I don't know                                                              |
| <b>Knowledge</b><br>Type of diet                      | categorical | 1 - carnivore; 2 - omnivore; 3 - herbivore; 4 - insectivore; 5 - I don't know                     |
| <b>Knowledge</b><br>Most abundant items in diet       | categorical | 1 - fruit; 2 - insects, slugs and worms; 3 - birds; 4 - I don't know                              |
| <b>Knowledge</b><br>Spine's function                  | categorical | 1 - protection; 2 - mating; 3- carry food; 4 - I don't know                                       |
| <b>Knowledge</b><br>Defensive behaviour               | categorical | 1 - aggression; 2 - curling up; 3 - I don't know                                                  |
| <b>Knowledge</b><br>Sociality features                | categorical | 1 - solitary; 2 - small communities; 3 – large communities; 4 - I don't know                      |
| <b>Knowledge</b><br>Most important senses             | categorical | 1 - sight and smell; 2 - smell and hearing; 3 - sight and hearing; 4 - I don't know               |

|                                              |             |                                                                                                                                                                                                                                                                                                                                                                                      |
|----------------------------------------------|-------------|--------------------------------------------------------------------------------------------------------------------------------------------------------------------------------------------------------------------------------------------------------------------------------------------------------------------------------------------------------------------------------------|
| <b>Knowledge</b><br>Litters per year         | categorical | 1 - one; 2 - two; 3 - three; 4 - I don't know                                                                                                                                                                                                                                                                                                                                        |
| <b>Knowledge</b><br>Cubs' caretaker          | categorical | 1 - mother; 2 - father; 3 - both parents; 4 - I don't know                                                                                                                                                                                                                                                                                                                           |
| <b>Knowledge</b><br>Target of predation      | categorical | 1 - yes; 2 - no; 3 - I don't know                                                                                                                                                                                                                                                                                                                                                    |
| <b>Knowledge</b><br>Disease transmission to  | categorical | 1 - humans; 2 - other animals; 3 - humans and animals; 4 - don't transmit; 5 - I don't know                                                                                                                                                                                                                                                                                          |
| <b>Explanatory</b>                           |             |                                                                                                                                                                                                                                                                                                                                                                                      |
| Gender                                       | categorical | 1 - female; 2 - male; 3 - non-binary                                                                                                                                                                                                                                                                                                                                                 |
| Age                                          | continuous  | 18 to 93                                                                                                                                                                                                                                                                                                                                                                             |
| Typology of parish of residency <sup>§</sup> | categorical | 1 – area predominantly urban (APU); 2 - area moderately urban (AMU); 3 – area predominantly rural (APR)                                                                                                                                                                                                                                                                              |
| Academic qualification                       | categorical | 1 - illiterate; 2 - 1 <sup>st</sup> cycle – (4th grade); 3 - 2 <sup>nd</sup> cycle (6th grade); 4 - 3 <sup>rd</sup> cycle (9th grade); 5 - High school (12th grade); 6 - Bachelor/Licentiate; 7 - Master's degree; 8 – doctorate                                                                                                                                                     |
| Profession/occupation <sup>¶</sup>           | categorical | 1 - legislative and executive power; 2 - intellectual and scientific activities; 3 - intermediate level; 4 - administration; 5 - personal services, security and sales; 6 - agriculture, fishing and forest; 7 - industry, building and craftspeople; 8 - installation, machines and line operators; 9 - unskilled workers; 10 - student; 11 - unemployed/doesn't work; 12 - retired |

<sup>§</sup> Portuguese classification of urban areas; <sup>¶</sup>Portuguese classification of professions
