# Supplementary material for: Prickly Connections: Sociodemographic Factors Shaping Attitudes, Perception and Biological Knowledge about the European Hedgehog
Source: MDPI journal article supplement (doi:10.3390/ani13233610), 2023-11-22
Supplement: s1 [file s1]

**Supplementary Figures S1 to S5** for “Prickly connections: sociodemographic factors shaping attitudes, perception and biological knowledge about hedgehog” by Ribeiro et al. 2023.

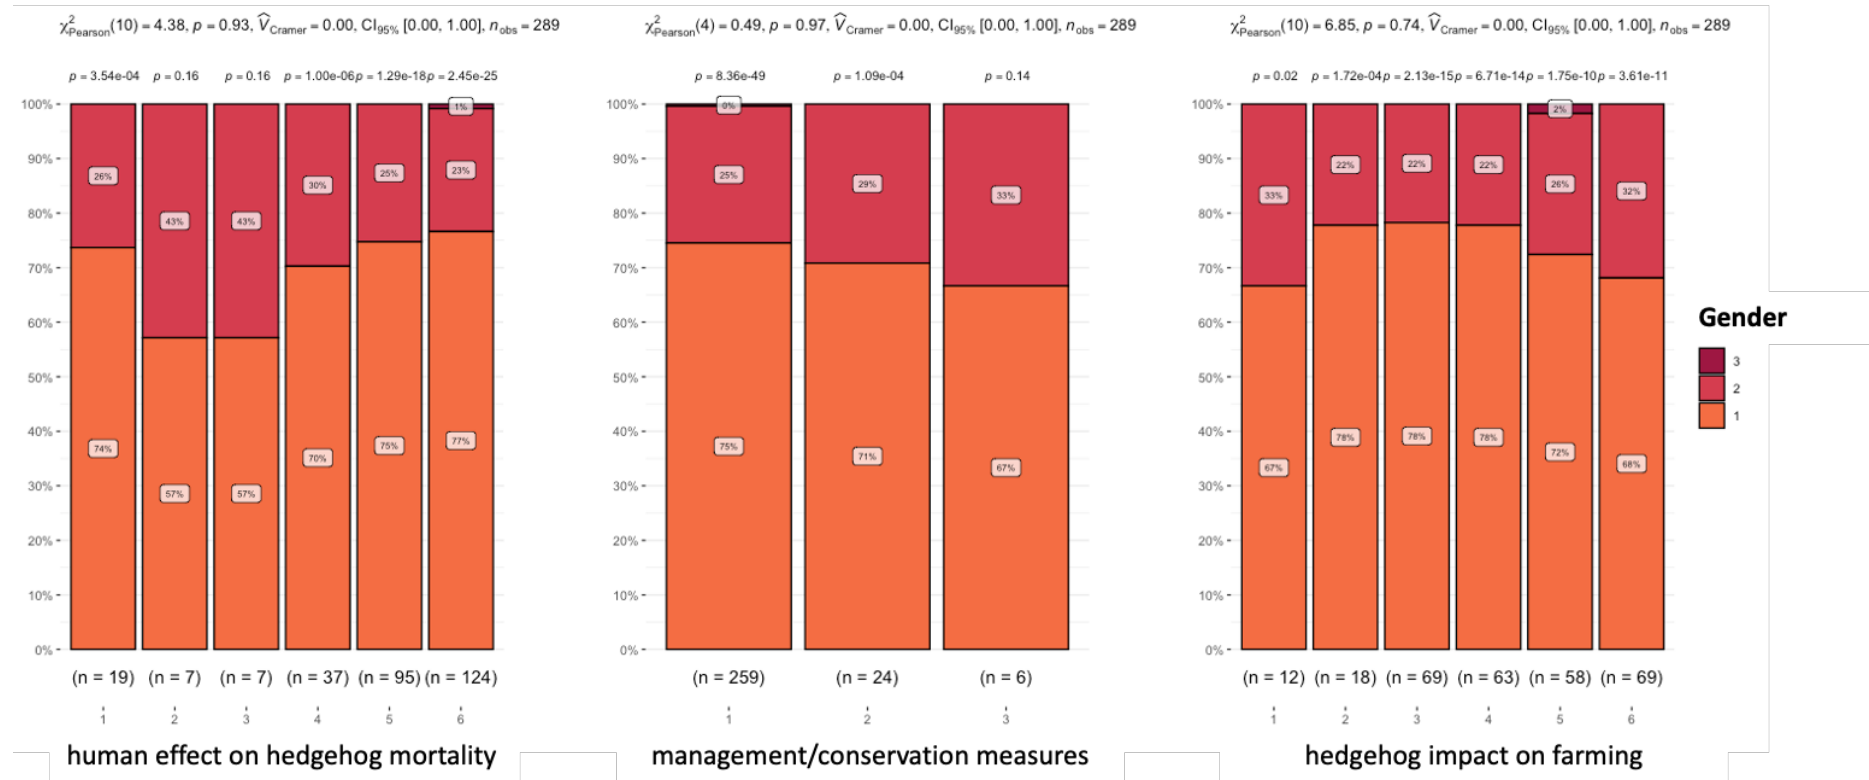

**Figure S1. Proportions test for gender in each category (defined in TableS1) for three perception variables assessed:** a) perceived human effect on hedgehog mortality, b) perceived need for management/conservation measures regarding hedgehogs; c) perceived impact of hedgehog on farming.

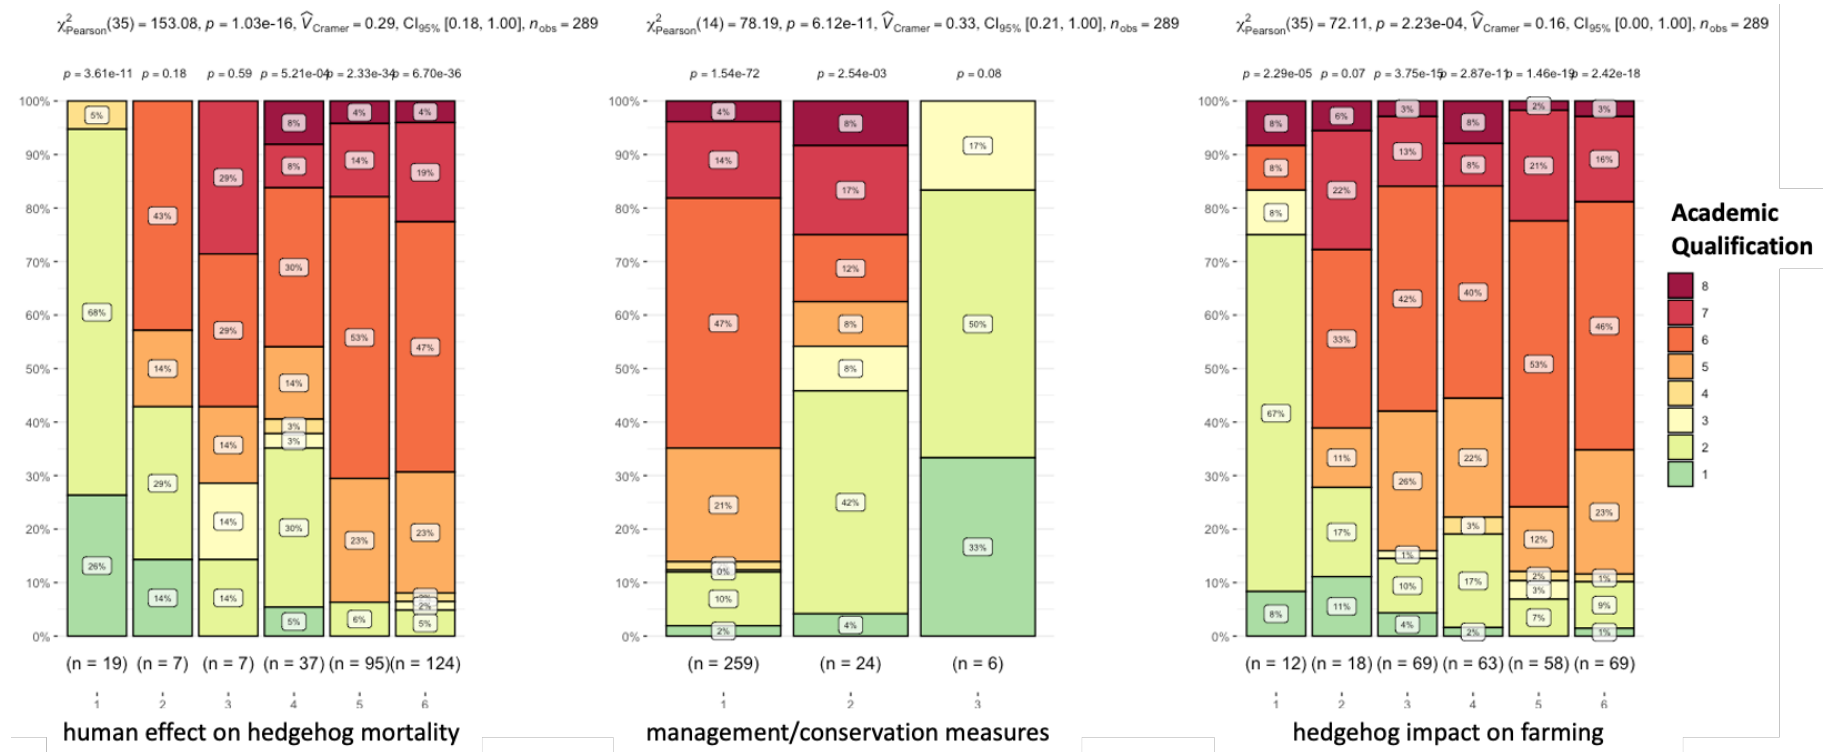

**Figure S2. Proportions test for Academic Qualification in each category (defined in TableS1) for three perception variables assessed: a) perceived human effect on hedgehog mortality, b) perceived need for management/conservation measures regarding hedgehogs; c) perceived impact of hedgehog on farming.**

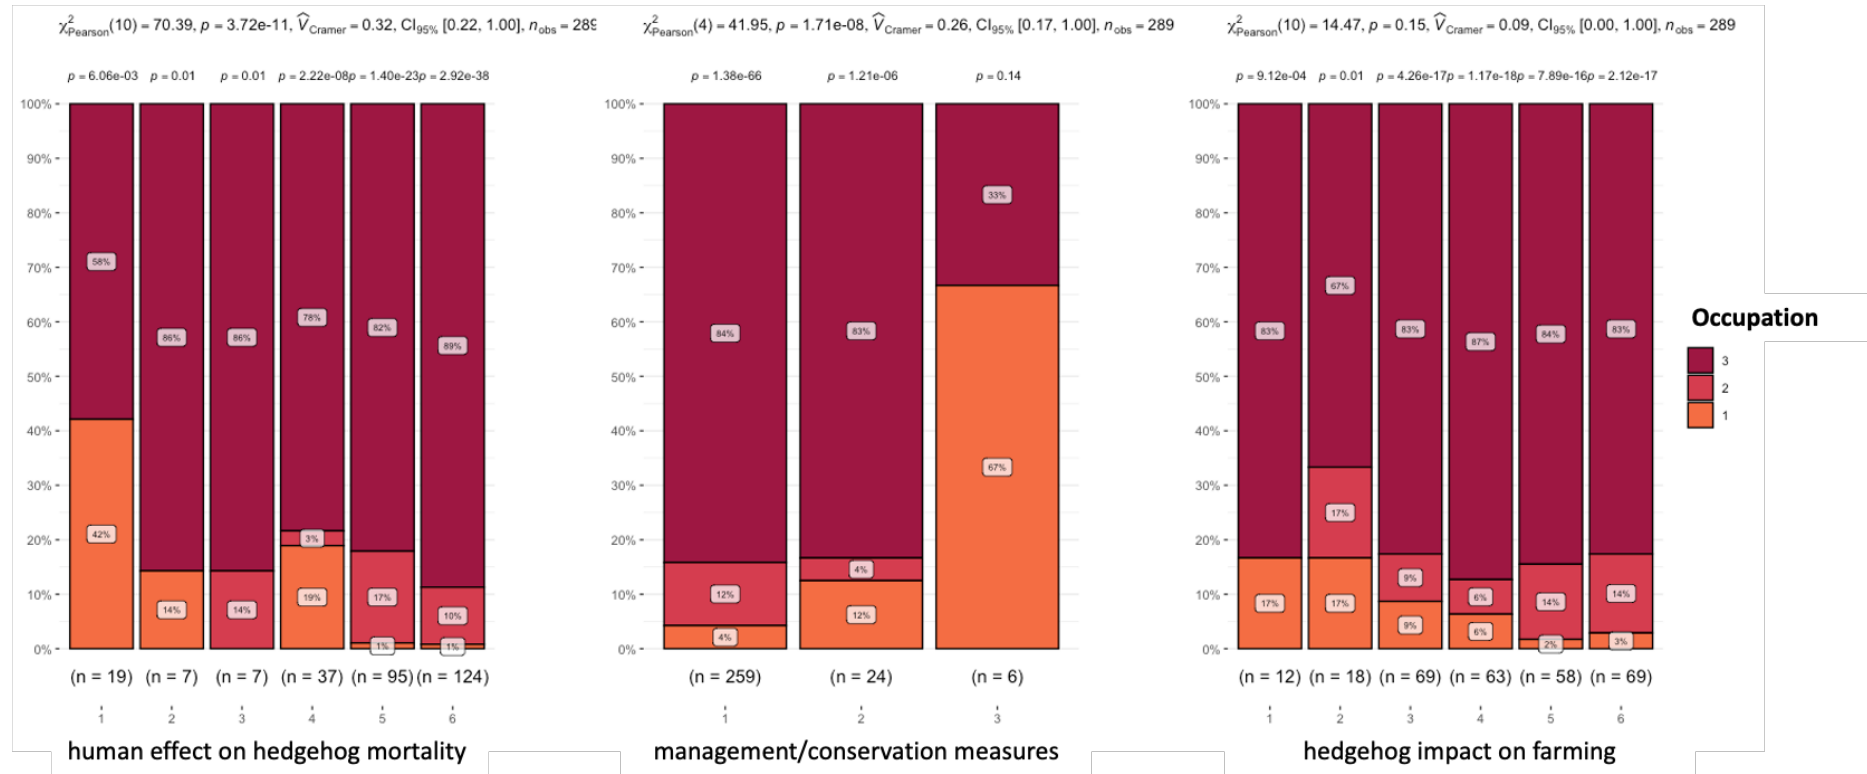

**Figure S3. Proportions test for Occupation in each category (defined in TableS1) for three perception variables assessed:** a) perceived human effect on hedgehog mortality, b) perceived need for management/conservation measures regarding hedgehogs; c) perceived impact of hedgehog on farming.

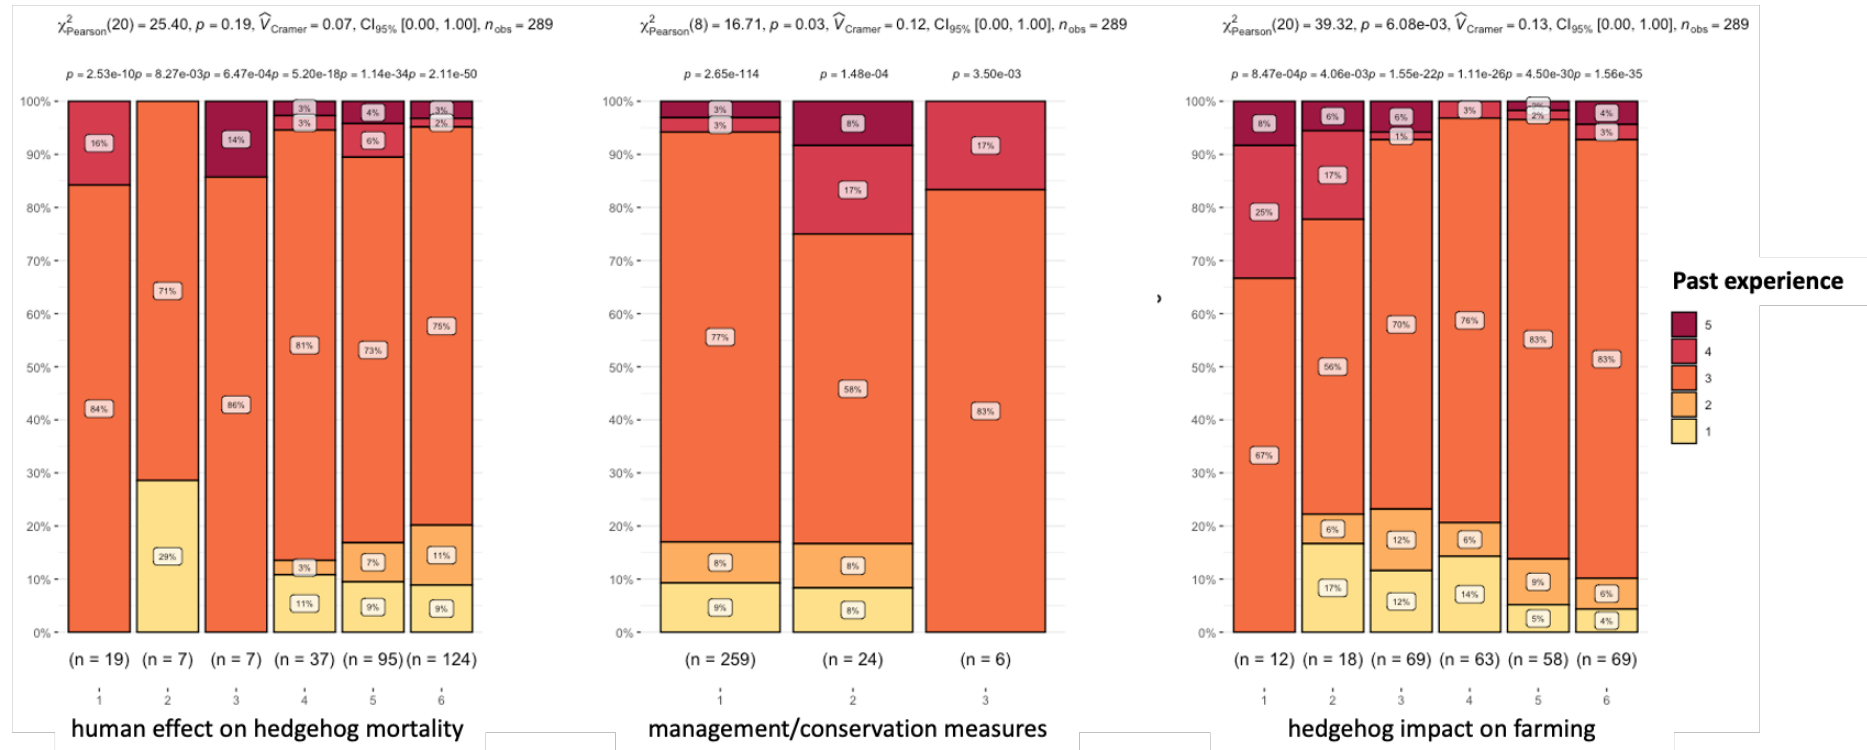

**Figure S4. Proportions test for Occupation in each category (defined in TableS1) for three perception variables assessed:** a) perceived human effect on hedgehog mortality, b) perceived need for management/conservation measures regarding hedgehogs; c) perceived impact of hedgehog on farming.

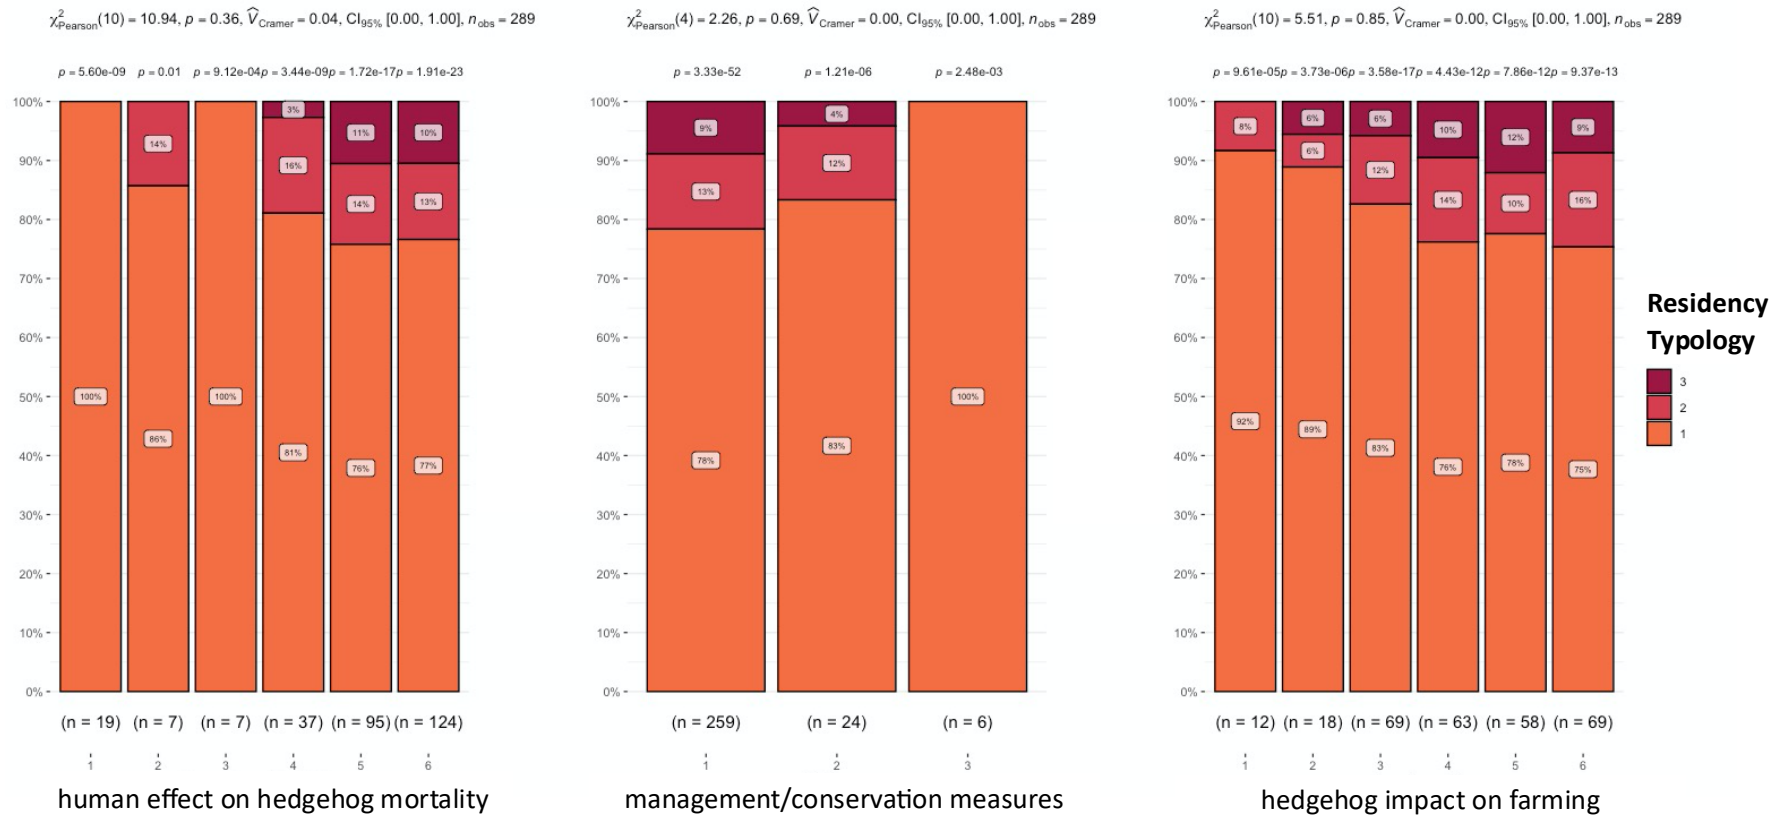

**Figure S5. Proportions test for the level of urbanization in the participants residency area – residency typology - for each category (defined in TableS1) for three perception variables assessed: a) perceived human effect on hedgehog mortality, b) perceived need for management/conservation measures regarding hedgehogs; c) perceived impact of hedgehog on farming.**
