# Supplementary material for: Prickly Connections: Sociodemographic Factors Shaping Attitudes, Perception and Biological Knowledge about the European Hedgehog
Source: Animals (Basel). 2023 Nov 22;13(23):3610. doi: 10.3390/ani13233610 (PMC10705511; doi:10.3390/ani13233610)
Supplement: Supplementary file 1 [file animals-13-03610-s001.zip]

Archive with 6 entries (6 files):
- FigureS1-5.pdf
- __MACOSX/._FigureS1-5.pdf
- SuppText_ConsentQuestionnaire.pdf
- __MACOSX/._SuppText_ConsentQuestionnaire.pdf
- TableS1.pdf
- __MACOSX/._TableS1.pdf
